# Supplementary material for: Correlation of Socioeconomic and Environmental Factors With Incidence of Crohn Disease in Children and Adolescents: Systematic Review and Meta-Regression
Source: JMIR Public Health Surveill. 2024 Mar 25;10:e48682. doi: 10.2196/48682 (PMC11002755; doi:10.2196/48682)
Supplement: Multimedia Appendix 14 [file publichealth_v10i1e48682_app14.pdf]

| Continent                     | Estimate | SE   | z-val | <i>P</i> -val | 95%-CI       | I <sup>2</sup> | R <sup>2</sup> | Exp. Coef. <sup>a</sup> |
|-------------------------------|----------|------|-------|---------------|--------------|----------------|----------------|-------------------------|
| model: IR ~ (Time)            |          |      |       |               |              |                |                |                         |
| Asia                          | 0.02     | 0.07 | 0.27  | .79           | -0.11 – 0.15 | 95.56 %        | 0.00 %         | 1.018                   |
| Australia/<br>Pacific         | -0.03    | 0.04 | -0.66 | .51           | -0.10 – 0.05 | 92.88 %        | 0.00%          | 0.973                   |
| Europe                        | 0.02     | 0.01 | 1.45  | .14           | -0.01 – 0.04 | 92.04 %        | 4.19%          | 1.017                   |
| North America                 | 0.03     | 0.02 | 2.01  | .04*          | 0.00 – 0.07  | 96.29 %        | 29.93 %        | 1.035                   |
| South<br>America <sup>1</sup> | -        | -    | -     | -             | -            | -              | -              | -                       |
