# Supplementary material for: Correlation of Socioeconomic and Environmental Factors With Incidence of Crohn Disease in Children and Adolescents: Systematic Review and Meta-Regression
Source: PubMed Central journal article supplement (PMC11002755; doi:10.2196/48682), 2024-03-25
Supplement: publichealth_v10i1e48682_app2.pdf [file publichealth_v10i1e48682_app2.pdf]

Risk of Bias

| Author                   | Recruitment procedere & follow up | Outcome definition und measurement | Outcome source and validation | Confounding and effect modification | Analysis method: methods to reduce research specific | Funding | Conflikt of Interest |
|--------------------------|-----------------------------------|------------------------------------|-------------------------------|-------------------------------------|------------------------------------------------------|---------|----------------------|
| Abramson et al. (2010)   | ●                                 | ●                                  | ●                             | ●                                   | ●                                                    | ●       | ●                    |
| Adamiak et al. (2013)    | ●                                 | ●                                  | ●                             | ●                                   | ●                                                    | ●       | ●                    |
| Ahmed et al. (2006)      | ●                                 | ●                                  | ●                             | ●                                   | ●                                                    | ●       | ●                    |
| Armitage et al. (2001)   | ●                                 | ●                                  | ●                             | ●                                   | ●                                                    | ●       | ●                    |
| Ashton et al. (2014)     | ●                                 | ●                                  | ●                             | ●                                   | ●                                                    | ●       | ●                    |
| Auvin et al. (2005)      | ●                                 | ●                                  | ●                             | ●                                   | ●                                                    | ●       | ●                    |
| Barton et al. (1989)     | ●                                 | ●                                  | ●                             | ●                                   | ●                                                    | ●       | ●                    |
| Benchimol et al. (2014)  | ●                                 | ●                                  | ●                             | ●                                   | ●                                                    | ●       | ●                    |
| Benchimol et al. (2017)  | ●                                 | ●                                  | ●                             | ●                                   | ●                                                    | ●       | ●                    |
| Bentsen et al. (2002)    | ●                                 | ●                                  | ●                             | ●                                   | ●                                                    | ●       | ●                    |
| Bitton et al. (2014)     | ●                                 | ●                                  | ●                             | ●                                   | ●                                                    | ●       | ●                    |
| Calkins et al. (1984)    | ●                                 | ●                                  | ●                             | ●                                   | ●                                                    | ●       | ●                    |
| Cosgrove et al. (1996)   | ●                                 | ●                                  | ●                             | ●                                   | ●                                                    | ●       | ●                    |
| El Mouzan et al. (2014)  | ●                                 | ●                                  | ●                             | ●                                   | ●                                                    | ●       | ●                    |
| El-Matary et al. (2014)  | ●                                 | ●                                  | ●                             | ●                                   | ●                                                    | ●       | ●                    |
| Fellows et al. (1990)    | ●                                 | ●                                  | ●                             | ●                                   | ●                                                    | ●       | ●                    |
| Ghione et al. (2018)     | ●                                 | ●                                  | ●                             | ●                                   | ●                                                    | ●       | ●                    |
| Gottrand et al. (1991)   | ●                                 | ●                                  | ●                             | ●                                   | ●                                                    | ●       | ●                    |
| Grieci, Büttner (2009)   | ●                                 | ●                                  | ●                             | ●                                   | ●                                                    | ●       | ●                    |
| Haug et al. (1989)       | ●                                 | ●                                  | ●                             | ●                                   | ●                                                    | ●       | ●                    |
| Henderson et al. (2012)  | ●                                 | ●                                  | ●                             | ●                                   | ●                                                    | ●       | ●                    |
| Hildebrand et al. (1994) | ●                                 | ●                                  | ●                             | ●                                   | ●                                                    | ●       | ●                    |
| Hildebrand et al. (2003) | ●                                 | ●                                  | ●                             | ●                                   | ●                                                    | ●       | ●                    |
| Hong et al. (2018)       | ●                                 | ●                                  | ●                             | ●                                   | ●                                                    | ●       | ●                    |
| Hope et al. (2012)       | ●                                 | ●                                  | ●                             | ●                                   | ●                                                    | ●       | ●                    |

Risk of Bias

| Author                            | Recruitment procedere & follow up | Outcome definition und measurement | Outcome source and validation | Confounding and effect modification | Analysis method: methods to reduce research specific bias | Funding | Conflikt of Interesst |
|-----------------------------------|-----------------------------------|------------------------------------|-------------------------------|-------------------------------------|-----------------------------------------------------------|---------|-----------------------|
| Isa et. Al. (2018)                | ●                                 | ●                                  | ●                             | ●                                   | ●                                                         | ●       | ●                     |
| Jacobsen B.A. et al. (2006)       | ●                                 | ●                                  | ●                             | ●                                   | ●                                                         | ●       | ●                     |
| Jacobsen, C. et al. (2008)        | ●                                 | ●                                  | ●                             | ●                                   | ●                                                         | ●       | ●                     |
| Jacobsen, C. et al. (2009)        | ●                                 | ●                                  | ●                             | ●                                   | ●                                                         | ●       | ●                     |
| Jacobsen, C. et al. (2011)        | ●                                 | ●                                  | ●                             | ●                                   | ●                                                         | ●       | ●                     |
| Jussila et al. (2012)             | ●                                 | ●                                  | ●                             | ●                                   | ●                                                         | ●       | ●                     |
| Karolewska-Bochenek et al. (2009) | ●                                 | ●                                  | ●                             | ●                                   | ●                                                         | ●       | ●                     |
| Kern et al. (2021)                | ●                                 | ●                                  | ●                             | ●                                   | ●                                                         | ●       | ●                     |
| Kugathasan et al. (2003)          | ●                                 | ●                                  | ●                             | ●                                   | ●                                                         | ●       | ●                     |
| Kuo et al. (2015)                 | ●                                 | ●                                  | ●                             | ●                                   | ●                                                         | ●       | ●                     |
| Kwak et al. (2019)                | ●                                 | ●                                  | ●                             | ●                                   | ●                                                         | ●       | ●                     |
| Larsen et al. (2016)              | ●                                 | ●                                  | ●                             | ●                                   | ●                                                         | ●       | ●                     |
| Lethinen et al. (2011)            | ●                                 | ●                                  | ●                             | ●                                   | ●                                                         | ●       | ●                     |
| Lindberg et al. (1991)            | ●                                 | ●                                  | ●                             | ●                                   | ●                                                         | ●       | ●                     |
| Lindberg et al. (2000)            | ●                                 | ●                                  | ●                             | ●                                   | ●                                                         | ●       | ●                     |
| Lindquist et al. (1984)           | ●                                 | ●                                  | ●                             | ●                                   | ●                                                         | ●       | ●                     |
| Lopez et al. (2018a)              | ●                                 | ●                                  | ●                             | ●                                   | ●                                                         | ●       | ●                     |
| Lopez et al.(2018)                | ●                                 | ●                                  | ●                             | ●                                   | ●                                                         | ●       | ●                     |
| Lovasz et al. (2014)              | ●                                 | ●                                  | ●                             | ●                                   | ●                                                         | ●       | ●                     |
| Malaty et al. (2010)              | ●                                 | ●                                  | ●                             | ●                                   | ●                                                         | ●       | ●                     |
| Malmborg et al. (2013)            | ●                                 | ●                                  | ●                             | ●                                   | ●                                                         | ●       | ●                     |
| Martin-de -Carpi et al. (2013)    | ●                                 | ●                                  | ●                             | ●                                   | ●                                                         | ●       | ●                     |
| Muller et al. (2013)              | ●                                 | ●                                  | ●                             | ●                                   | ●                                                         | ●       | ●                     |
| Nyhlin et al. (1986)              | ●                                 | ●                                  | ●                             | ●                                   | ●                                                         | ●       | ●                     |
| Olafsdottir et al. (1989)         | ●                                 | ●                                  | ●                             | ●                                   | ●                                                         | ●       | ●                     |
| Ong et al. (2018)                 | ●                                 | ●                                  | ●                             | ●                                   | ●                                                         | ●       | ●                     |

Risk of Bias

| Author                            | Recruitment<br>procedere &<br>follow up | Outcome definition<br>und measurement | Outcome source<br>and validation | Confounding and<br>effect modification | Analysis method:<br>methods to reduce<br>research specific bias | Funding | Conflikt of Interesst |
|-----------------------------------|-----------------------------------------|---------------------------------------|----------------------------------|----------------------------------------|-----------------------------------------------------------------|---------|-----------------------|
| Orel et al. (2009)                | ●                                       | ●                                     | ●                                | ●                                      | ●                                                               | ●       | ●                     |
| Phavichitr et al. (2003)          | ●                                       | ●                                     | ●                                | ●                                      | ●                                                               | ●       | ●                     |
| Schwarz et al. (2017)             | ●                                       | ●                                     | ●                                | ●                                      | ●                                                               | ●       | ●                     |
| Shivashankar et al. (2017)        | ●                                       | ●                                     | ●                                | ●                                      | ●                                                               | ●       | ●                     |
| Sjoberg et al. (2013)             | ●                                       | ●                                     | ●                                | ●                                      | ●                                                               | ●       | ●                     |
| Sjoberg et al (2014)              | ●                                       | ●                                     | ●                                | ●                                      | ●                                                               | ●       | ●                     |
| Stordal et al. (2004)             | ●                                       | ●                                     | ●                                | ●                                      | ●                                                               | ●       | ●                     |
| Stowe et al. (1990)               | ●                                       | ●                                     | ●                                | ●                                      | ●                                                               | ●       | ●                     |
| Turunen et al. (2006)             | ●                                       | ●                                     | ●                                | ●                                      | ●                                                               | ●       | ●                     |
| Urlep et al. (2014)               | ●                                       | ●                                     | ●                                | ●                                      | ●                                                               | ●       | ●                     |
| Urlep et al. (2015)               | ●                                       | ●                                     | ●                                | ●                                      | ●                                                               | ●       | ●                     |
| Urne et al. (2002)                | ●                                       | ●                                     | ●                                | ●                                      | ●                                                               | ●       | ●                     |
| van der Zaag-Loonen et al. (2004) | ●                                       | ●                                     | ●                                | ●                                      | ●                                                               | ●       | ●                     |
| Vicentin et al. (2017)            | ●                                       | ●                                     | ●                                | ●                                      | ●                                                               | ●       | ●                     |
| Virta et al. (2017)               | ●                                       | ●                                     | ●                                | ●                                      | ●                                                               | ●       | ●                     |
| Wang et al. (2013)                | ●                                       | ●                                     | ●                                | ●                                      | ●                                                               | ●       | ●                     |
| Watson et al. (2002)              | ●                                       | ●                                     | ●                                | ●                                      | ●                                                               | ●       | ●                     |
| Wittig et al. (2019)              | ●                                       | ●                                     | ●                                | ●                                      | ●                                                               | ●       | ●                     |
| Yamamoto-Furusho et al. (2019)    | ●                                       | ●                                     | ●                                | ●                                      | ●                                                               | ●       | ●                     |
| Yap et al. (2008)                 | ●                                       | ●                                     | ●                                | ●                                      | ●                                                               | ●       | ●                     |
| Zyanyi et al. (2017)              | ●                                       | ●                                     | ●                                | ●                                      | ●                                                               | ●       | ●                     |
