# Supplementary material for: Correlation of Socioeconomic and Environmental Factors With Incidence of Crohn Disease in Children and Adolescents: Systematic Review and Meta-Regression
Source: PubMed Central journal article supplement (PMC11002755; doi:10.2196/48682), 2024-03-25
Supplement: publichealth_v10i1e48682_app3.pdf [file publichealth_v10i1e48682_app3.pdf]

## Summary of the included studies

| ID | Author                            | Year | Start | Cont          | Pop      | size   | IR   | lower | upper | SEM   |      |
|----|-----------------------------------|------|-------|---------------|----------|--------|------|-------|-------|-------|------|
| 1  | Abramson et al. (2010)            | 2010 | 1996  | North America | 750000   |        | 675  | 2,86  | 2,07  | 3,65  | 0,38 |
| 2  | Adamiak et al. (2013)             | 2013 | 2000  | North America | 1300000  |        | 675  | 6,6   | .     | .     | .    |
| 3  | Ahmed et al. (2006)               | 2006 | 1996  | Europe        | 90000    |        | 992  | 3,6   | .     | .     | .    |
| 4  | Armitage et al. (2001)            | 2001 | 1981  | Europe        | 1156631  |        | 652  | 2,68  | 1,8   | 3,55  | 0,42 |
| 5  | Ashton et al. (2014)              | 2014 | 2002  | Europe        | 650000   | 195397 |      | 4,79  | 1,69  | 7,9   | 0,98 |
| 6  | Auvin et al. (2005)               | 2005 | 1988  | Europe        | 1312141  |        | 7066 | 2,28  | 2,17  | 2,39  | 0,05 |
| 7  | Barton et al. (1989)              | 1989 | 1970  | Europe        | 1363573  |        | 9688 | 1,39  | 1,13  | 1,65  | 0,13 |
| 8  | Benchimol et al. (2014)           | 2014 | 1994  | North America | 13500000 |        | 2667 | 4,87  | 0,78  | 8,95  | 1,77 |
| 9  | Benchimol et al. (2017)           | 2017 | 1999  | North America | 26530074 |        | 8278 | 7,07  | 3,77  | 10,37 | 1,58 |
| 10 | Bentsen et al. (2002)             | 2002 | 1990  | Europe        | 166456   |        | 3062 | 2,87  | -1,78 | 7,52  | 1,46 |
| 11 | Bitton et al. (2014)              | 2014 | 2001  | North America | 240937   |        | 1967 | 11,4  | -5,08 | 27,88 | 5,18 |
| 12 | Calkins et al. (1984)             | 1984 | 1973  | North America | 2174000  |        | 345  | 2,21  | 1,09  | 3,32  | 0,52 |
| 13 | Cosgrove et al. (1996)            | 1996 | 1983  | Europe        | 90000    |        | 60   | 3,25  | 1,32  | 5,18  | 0,61 |
| 14 | El Mouzan et al. (2014)           | 2014 | 2003  | Asia          | 7128085  |        | 323  | 0,27  | 0,18  | 0,35  | 0,04 |
| 15 | El-Matary et al. (2014)           | 2014 | 1978  | North America | 283167   |        | 392  | 2,78  | 1,48  | 4,07  | 0,5  |
| 16 | Fellows et al. (1990)             | 1990 | 1976  | Europe        | 215300   |        | 268  | 3,15  | -3,09 | 9,39  | 1,96 |
| 17 | Ghione et al. (2018)              | 2018 | 1988  | Europe        | 1312141  |        | 1225 | 3,08  | 0,91  | 5,25  | 0,94 |
| 18 | Gottrand et al. (1991)            | 1991 | 1988  | Europe        | 1054660  |        | 1350 | 2,1   | .     | .     | .    |
| 19 | Grieci, Büttner et al. (2009)     | 2009 | 1997  | North America | 352395   |        | 298  | 4,8   | 1,68  | 7,93  | 0,73 |
| 20 | Haug et al. (2009)                | 2009 | 1992  | Europe        | 403500   |        | 74   | 5,58  | 4,31  | 6,84  | 0,4  |
| 21 | Henderson et al. (2012)           | 2012 | 1990  | Europe        | 499142   |        | 645  | 3,83  | 1,78  | 5,88  | 0,93 |
| 22 | Hildebrand et al. (1994)          | 1994 | 1983  | Europe        | 288941   |        | 135  | 2,44  | 0,59  | 4,29  | 0,78 |
| 23 | Hildebrand et al. (2003)          | 2003 | 1990  | Europe        | 18000    |        | 191  | 5,54  | 3,36  | 7,72  | 0,96 |
| 24 | Hong et al. (2018)                | 2018 | 2011  | Asia          | 974638   |        | 124  | 1,71  | 0,93  | 2,49  | 0,3  |
| 25 | Hope et al. (2012)                | 2012 | 2005  | Europe        | 888310   |        | 349  | 2,3   | .     | .     | .    |
| 26 | Isa et. al. (2018)                | 2018 | 1987  | Asia          | 343176   |        | 207  | 0,79  | -0,89 | 2,46  | 0,39 |
| 27 | Jacobsen B.A. et al. (2006)       | 2006 | 1978  | Europe        | 486274   |        | 1217 | 1,45  | -0,46 | 3,36  | 0,15 |
| 28 | Jacobsen, C. et al. (2008)        | 2008 | 2002  | Europe        | 430671   |        | 503  | 2,68  | 2,14  | 3,21  | 0,22 |
| 29 | Jacobsen, C. et al. (2009)        | 2009 | 1996  | Europe        | 117216   |        | 243  | 3,1   | .     | .     | .    |
| 30 | Jacobsen, C. et al. (2011)        | 2011 | 2007  | Europe        | 668056   |        | 50   | 3,2   | .     | .     | .    |
| 31 | Jussila et al. (2012)             | 2012 | 2000  | Europe        | 5180000  |        | 130  | 0,2   | .     | .     | .    |
| 32 | Karolewska-Bochenek et al. (2009) | 2009 | 2002  | Europe        | 9000000  |        | 491  | 0,82  | -0,36 | 2     | 0,42 |
| 33 | Kern et al. (2021)                | 2021 | 2000  | Europe        | 436305   |        | 344  | 4,49  | 3,52  | 5,45  | 0,45 |
| 34 | Kugathasan et al. (2003)          | 2003 | 2000  | North America | 540000   |        | 491  | 4,56  | .     | .     | .    |
| 35 | Kuo et al. (2015)                 | 2015 | 2000  | Asia          | 15818502 |        | 177  | 0,14  | 0,05  | 0,22  | 0,03 |
| 36 | Kwak et al. (2019)                | 2019 | 2009  | Asia          | 12127750 |        | 170  | 0,53  | 0,24  | 0,81  | 0,13 |
| 37 | Larsen et al. (2016)              | 2016 | 1995  | Europe        | 1000000  |        | 1820 | 6,53  | 0,66  | 12,39 | 1,84 |

## Summary of the included studies

|    |                                   |      |                       |          |      |       |        |       |   |      |
|----|-----------------------------------|------|-----------------------|----------|------|-------|--------|-------|---|------|
| 38 | Lehtinen et al. (2011)            | 2011 | 1993 Europe           | 1100000  | 1880 | 8,4   | .      | .     | . |      |
| 39 | Lindberg et al. (1991)            | 1991 | 1983 Europe           | 164972   | 972  | 2,37  | -6,35  | 11,09 |   | 2,03 |
| 40 | Lindberg et al. (2000)            | 2000 | 1989 Europe           | 942898   | 246  | 1,3   | .      | .     | . |      |
| 41 | Lindquist et al. (1984)           | 1984 | 1971 Europe           | 56000    | 639  | 6,1   | .      | .     | . |      |
| 42 | Lopez et al. (2018a)              | 2018 | 2015 Australia/ Pacif | 110716   | 161  | 6,36  | 4,69   | 8,03  |   | 0,8  |
| 43 | Lopez et al. (2018)               | 2018 | 2001 Australia/ Pacif | 977800   | 51   | 3,5   | .      | .     | . |      |
| 44 | Lovasz et al. (2014)              | 2014 | 1994 Europe           | 11400    | 863  | 3,6   | -42,14 | 49,34 |   | 3,6  |
| 45 | Malaty et al. (2010)              | 2010 | 1991 North America    | 1227491  | 358  | 1     | -3,26  | 5,25  |   | 0,34 |
| 46 | Malmborg et al. (2013)            | 2013 | 2002 Europe           | 188437   | 153  | 9,19  | 7,96   | 10,41 |   | 0,5  |
| 47 | Martin-de -Carpi et al. (2013)    | 2013 | 1996 Europe           | 8160000  | 1712 | 1,12  | -6,32  | 8,55  |   | 0,58 |
| 48 | Muller et al. (2013)              | 2013 | 2007 Europe           | 1800000  | 2107 | 4,72  | .      | .     | . |      |
| 49 | Nyhlin et al. (1986)              | 1986 | 1974 Europe           | 43861    | 271  | 3,63  | -0,79  | 8,04  |   | 1,39 |
| 50 | Olafsdottir et al. (1989)         | 1989 | 1984 Europe           | 198570   | 221  | 2,5   | .      | .     | . |      |
| 51 | Ong et al. (2018)                 | 2018 | 2004 Asia             | 910761   | 204  | 0,74  | 0,04   | 1,44  |   | 0,29 |
| 52 | Orel et al. (2009)                | 2009 | 1994 Europe           | 283361   | 167  | 2,43  | 1,32   | 3,54  |   | 0,26 |
| 53 | Phavichitr et al. (2003)          | 2003 | 1985 Australia/ Pacif | 1080767  | 280  | 11,09 | -15,07 | 37,24 |   | 6,08 |
| 54 | Schwarz et al. (2017)             | 2017 | 2008 Europe           | 82588    | 261  | 5,4   | -4,76  | 15,56 |   | 0,8  |
| 55 | Shivashankar et al. (2017)        | 2017 | 1985 North America    | 33501    | 893  | 8,39  | 7,46   | 9,33  |   | 0,44 |
| 56 | Sjoberg et al. (2014)             | 2014 | 2005 Europe           | 642117   | 279  | 6,9   | -32,49 | 46,29 |   | 3,1  |
| 57 | Stordal et al. (2004)             | 2004 | 1990 Europe           | 174482   | 471  | 2,7   | .      | .     | . |      |
| 58 | Stowe et al. (1990)               | 1990 | 1980 North America    | 460497   | 1247 | 3,98  | -0,55  | 8,51  |   | 1,42 |
| 59 | Tourtelier et al. (2000)          | 2000 | 1994 Europe           | 618049   | 1377 | 1,6   | 1,17   | 2,03  |   | 0,15 |
| 60 | Turunen et al. (2006)             | 2006 | 1995 Europe           | 75706    | 645  | 1,89  | 1,42   | 2,35  |   | 0,22 |
| 61 | Urlep et al. (2014)               | 2014 | 2002 Europe           | 148702   | 145  | 4,69  | 3,92   | 5,47  |   | 0,36 |
| 62 | Urlep et al. (2015)               | 2015 | 2002 Europe           | 414323   | 260  | 4,56  | 3,88   | 5,23  |   | 0,29 |
| 63 | Urne et al. (2002)                | 2002 | 1998 Europe           | 421898   | 158  | 2,27  | 1,89   | 2,65  |   | 0,09 |
| 64 | van der Zaag_Loonen et al. (2004) | 2004 | 1999 Europe           | 3873000  | 98   | 2,1   | .      | .     | . |      |
| 65 | Vicentin et al. (2017)            | 2017 | 2012 South America    | 11691156 | 107  | 0,17  | .      | .     | . |      |
| 66 | Virta et al. (2017)               | 2017 | 2001 Europe           | 1235000  | 5379 | 7,96  | 6,44   | 9,48  |   | 0,75 |
| 67 | Wang et al. (2013)                | 2013 | 2005 Asia             | 112013   | 482  | 2,96  | 1,75   | 4,17  |   | 0,44 |
| 68 | Watson et al. (2002)              | 2002 | 1990 Europe           | 987470   | 130  | 3,3   | -10,68 | 17,28 |   | 1,1  |
| 69 | Wittig et al. (2019)              | 2019 | 2009 Europe           | 1074030  | 712  | 11,32 | -1,86  | 24,5  |   | 4,75 |
| 70 | Yamamoto-Furusko et al. (2019)    | 2019 | 2007 South America    | 40951452 | 1582 | 0,3   | 0,1    | 0,5   |   | 0,1  |
| 71 | Yap et al. (2008)                 | 2008 | 2002 Australia/ Pacif | 885000   | 2073 | 1,9   | .      | .     | . |      |
| 72 | Zyyani et al. 2017)               | 2017 | 2000 Asia             | 283951   | 370  | 4,37  | -2,98  | 11,71 |   | 1,71 |
