# Supplementary material for: Correlation of Socioeconomic and Environmental Factors With Incidence of Crohn Disease in Children and Adolescents: Systematic Review and Meta-Regression
Source: PubMed Central journal article supplement (PMC11002755; doi:10.2196/48682), 2024-03-25
Supplement: publichealth_v10i1e48682_app4.pdf [file publichealth_v10i1e48682_app4.pdf]

## Supplement References of the found studies

- Abramson, O., M. Durant, W. Mow, A. Finley, P. Kodali, A. Wong, V. Tavares, u. a. „Incidence, Prevalence, and Time Trends of Pediatric Inflammatory Bowel Disease in Northern California, 1996 to 2006“. *J Pediatr* 157, Nr. 2 (August 2010): 233-239.e1. <https://doi.org/10.1016/j.jpeds.2010.02.024>.
- Adamiak, T., D. Walkiewicz-Jedrzejczak, D. Fish, C. Brown, J. Tung, K. Khan, W. Faubion Jr., u. a. „Incidence, Clinical Characteristics, and Natural History of Pediatric IBD in Wisconsin: A Population-Based Epidemiological Study“. *Inflamm Bowel Dis* 19, Nr. 6 (Mai 2013): 1218–23. <https://doi.org/10.1097/MIB.0b013e318280b13e>.
- Ahmed, M., I. H. Davies, K. Hood, und H. R. Jenkins. „Incidence of Paediatric Inflammatory Bowel Disease in South Wales“. *Arch Dis Child* 91, Nr. 4 (April 2006): 344–45. <https://doi.org/10.1136/adc.2004.067413>.
- Armitage, E., H. E. Drummond, D. C. Wilson, und S. Ghosh. „Increasing Incidence of Both Juvenile-Onset Crohn’s Disease and Ulcerative Colitis in Scotland“. *Eur J Gastroenterol Hepatol* 13, Nr. 12 (Dezember 2001): 1439–47.
- Ashton, J. J., A. E. Wiskin, S. Ennis, A. Batra, N. A. Afzal, und R. M. Beattie. „Rising Incidence of Paediatric Inflammatory Bowel Disease (PIBD) in Wessex, Southern England“. *Arch Dis Child* 99, Nr. 7 (Juli 2014): 659–64. <https://doi.org/10.1136/archdischild-2013-305419>.
- Auvin, Stéphane, Florence Molinié, Corinne Gower-Rousseau, Franck Brazier, Véronique Merle, Bruno Grandbastien, Raymond Marti, u. a. „Incidence, Clinical Presentation and Location at Diagnosis of Pediatric Inflammatory Bowel Disease: A Prospective Population-Based Study in Northern {France} (1988-1999)“. *Journal of Pediatric Gastroenterology and Nutrition* 41, Nr. 1 (Juli 2005): 49–55. <https://doi.org/10.1097/01.mpg.0000162479.74277.86>.
- Barton, J. R., S. Gillon, und A. Ferguson. „Incidence of Inflammatory Bowel Disease in Scottish Children between 1968 and 1983; Marginal Fall in Ulcerative Colitis, Three-Fold Rise in Crohn’s Disease“. *Gut* 30, Nr. 5 (Mai 1989): 618–22. <https://doi.org/10.1136/gut.30.5.618>.
- Benchimol, E. I., C. N. Bernstein, A. Bitton, M. W. Carroll, H. Singh, A. R. Otley, M. Vutcovici, u. a. „Trends in Epidemiology of Pediatric Inflammatory Bowel Disease in Canada: Distributed Network Analysis of Multiple Population-Based Provincial Health Administrative Databases“. *Am J Gastroenterol* 112, Nr. 7 (Juli 2017): 1120–34. <https://doi.org/10.1038/ajg.2017.97>.
- Benchimol, E. I., D. R. Mack, G. C. Nguyen, S. B. Snapper, W. Li, N. Mojaverian, P. Quach, und A. M. Muise. „Incidence, Outcomes, and Health Services Burden of Very Early Onset Inflammatory Bowel Disease“. *Gastroenterology* 147, Nr. 4 (Oktober 2014): 803-813.e7; quiz e14-5. <https://doi.org/10.1053/j.gastro.2014.06.023>.
- Bentsen, B. S., B. Moum, und A. Ekbom. „Incidence of Inflammatory Bowel Disease in Children in Southeastern Norway: A Prospective Population-Based Study 1990-94“. *Scand J Gastroenterol* 37, Nr. 5 (Mai 2002): 540–45. <https://doi.org/10.1080/00365520252903080>.

- Bitton, A., M. Vutcovici, V. Patenaude, M. Sewitch, S. Suissa, und P. Brassard. „Epidemiology of Inflammatory Bowel Disease in Quebec: Recent Trends“. *Inflamm Bowel Dis* 20, Nr. 10 (Oktober 2014): 1770–76. <https://doi.org/10.1097/mib.000000000000162>.
- Calkins, B. M., A. M. Lilienfeld, C. F. Garland, und A. I. Mendeloff. „Trends in Incidence Rates of Ulcerative Colitis and Crohn’s Disease“. *Dig Dis Sci* 29, Nr. 10 (Oktober 1984): 913–20. <https://doi.org/10.1007/bf01312480>.
- Cosgrove, M., R. F. Al-Atia, und H. R. Jenkins. „The Epidemiology of Paediatric Inflammatory Bowel Disease“. *Arch Dis Child* 74, Nr. 5 (Mai 1996): 460–61. <https://doi.org/10.1136/adc.74.5.460>.
- El Mouzan, M. I., O. Saadah, K. Al-Saleem, M. Al Edreesi, M. Hasosah, A. Alanazi, M. Al Mofarreh, u. a. „Incidence of Pediatric Inflammatory Bowel Disease in Saudi Arabia: A Multicenter National Study“. *Inflamm Bowel Dis* 20, Nr. 6 (Juni 2014): 1085–90. <https://doi.org/10.1097/mib.0000000000000048>.
- El-Matary, W., S. P. Moroz, und C. N. Bernstein. „Inflammatory Bowel Disease in Children of Manitoba: 30 Years’ Experience of a Tertiary Center“. *J Pediatr Gastroenterol Nutr* 59, Nr. 6 (Dezember 2014): 763–66. <https://doi.org/10.1097/mpg.0000000000000525>.
- Fellows, I. W., J. G. Freeman, und G. K. Holmes. „Crohn’s Disease in the City of Derby, 1951–85“. *Gut* 31, Nr. 11 (November 1990): 1262–65. <https://doi.org/10.1136/gut.31.11.1262>.
- Ghione, S., H. Sarter, M. Fumery, L. Armengol-Debeir, G. Savoye, D. Ley, C. Spyckerelle, u. a. „Dramatic Increase in Incidence of Ulcerative Colitis and Crohn’s Disease (1988–2011): A Population-Based Study of French Adolescents“. *Am J Gastroenterol* 113, Nr. 2 (Februar 2018): 265–72. <https://doi.org/10.1038/ajg.2017.228>.
- Gottrand, F., J. F. Colombel, L. Moreno, J. L. Salomez, J. P. Farriaux, und A. Cortot. „[Incidence of inflammatory bowel diseases in children in the Nord-Pas-de-Calais region]“. *Arch Fr Pediatr* 48, Nr. 1 (Januar 1991): 25–28.
- Grieci, T., und A. Butter. „The Incidence of Inflammatory Bowel Disease in the Pediatric Population of Southwestern Ontario“. *J Pediatr Surg* 44, Nr. 5 (Mai 2009): 977–80. <https://doi.org/10.1016/j.jpedsurg.2009.01.038>.
- Haug, K., E. Schrumpf, J. F. Halvorsen, G. Fluge, E. Hamre, T. Hamre, und R. Skjollingstad. „Epidemiology of Crohn’s Disease in Western Norway. Study Group of Inflammatory Bowel Disease in Western Norway“. *Scand J Gastroenterol* 24, Nr. 10 (Dezember 1989): 1271–75. <https://doi.org/10.3109/00365528909090798>.
- Henderson, P., R. Hansen, F. L. Cameron, K. Gerasimidis, P. Rogers, W. M. Bisset, E. L. Reynish, u. a. „Rising Incidence of Pediatric Inflammatory Bowel Disease in Scotland“. *Inflamm Bowel Dis* 18, Nr. 6 (Juni 2012): 999–1005. <https://doi.org/10.1002/ibd.21797>.
- Hildebrand, H., M. Brydolf, L. Holmquist, I. Krantz, und B. Kristiansson. „Incidence and Prevalence of Inflammatory Bowel Disease in Children in South-Western Sweden“. *Acta Paediatr* 83, Nr. 6 (Juni 1994): 640–45. <https://onlinelibrary.wiley.com/doi/abs/10.1111/j.16512227.1994.tb13098.x?sid=nlm%3Apubmed>.

- Hildebrand, H., Y. Finkel, L. Grahnquist, J. Lindholm, A. Ekblom, and J. Askling. „Changing Pattern of Paediatric Inflammatory Bowel Disease in Northern Stockholm 1990-2001“. *Gut* 52, Nr. 10 (Oktober 2003): 1432–34. <https://doi.org/10.1136/gut.52.10.1432>.
- Hong, S. J., S. M. Cho, B. H. Choe, H. J. Jang, K. H. Choi, B. Kang, J. E. Kim, and J. H. Hwang. „Characteristics and Incidence Trends for Pediatric Inflammatory Bowel Disease in Daegu-Kyungpook Province in Korea: A Multi-Center Study“. *J Korean Med Sci* 33, Nr. 18 (30. April 2018): e132. <https://doi.org/10.3346/jkms.2018.33.e132>.
- Hope, B., R. Shahdadi, C. Dunne, A. M. Broderick, T. Grant, M. Hamzawi, K. O’Driscoll, S. Quinn, S. Hussey, and B. Bourke. „Rapid Rise in Incidence of Irish Paediatric Inflammatory Bowel Disease“. *Arch Dis Child* 97, Nr. 7 (Juli 2012): 590–94. <https://doi.org/10.1136/archdischild-2011-300651>.
- Isa, H. M., A. M. Mohamed, H. E. Al-Jowder, K. A. Matrook, and H. H. Althawadi. „Pediatric crohn’s disease in Bahrain“. *Oman Medical Journal* 33, Nr. 4 (2018): 299–308. <https://doi.org/10.5001/omj.2018.56>.
- Jacobsen, B. A., J. Fallingborg, H. H. Rasmussen, K. R. Nielsen, A. M. Drewes, E. Puho, G. L. Nielsen, and H. T. Sorensen. „Increase in Incidence and Prevalence of Inflammatory Bowel Disease in Northern Denmark: A Population-Based Study, 1978-2002“. *Eur J Gastroenterol Hepatol* 18, Nr. 6 (Juni 2006): 601–6. <https://doi.org/10.1097/00042737-200606000-00005>.
- Jakobsen, C., A. Paerregaard, P. Munkholm, J. Faerk, A. Lange, J. Andersen, M. Jakobsen, I. Kramer, J. Czernia-Mazurkiewicz, and V. Wewer. „Pediatric Inflammatory Bowel Disease: Increasing Incidence, Decreasing Surgery Rate, and Compromised Nutritional Status: A Prospective Population-Based Cohort Study 2007-2009“. *Inflamm Bowel Dis* 17, Nr. 12 (Dezember 2011): 2541–50. <https://doi.org/10.1002/ibd.21654>.
- Jakobsen, C., A. Paerregaard, P. Munkholm, and V. Wewer. „Paediatric Inflammatory Bowel Disease during a 44-Year Period in Copenhagen County: Occurrence, Course and Prognosis—a Population-Based Study from the Danish Crohn Colitis Database“. *Eur J Gastroenterol Hepatol* 21, Nr. 11 (November 2009): 1291–1301. <https://doi.org/10.1097/MEG.0b013e32832a4ed6>.
- Jakobsen, C., V. Wewer, F. Urne, J. Andersen, J. Faerk, I. Kramer, B. Stagegaard, B. Pilgaard, B. Weile, and A. Paerregaard. „Incidence of ulcerative colitis and Crohn’s disease in Danish children: Still rising or levelling out?“. *Journal of Crohn’s and Colitis* 2, Nr. 2 (2008): 152–57. <https://doi.org/10.1016/j.crohns.2008.01.006>.
- Jussila, A., L. J. Virta, H. Kautiainen, M. Rekiaro, U. Nieminen, and M. A. Farkkila. „Increasing Incidence of Inflammatory Bowel Diseases between 2000 and 2007: A Nationwide Register Study in Finland“. *Inflamm Bowel Dis* 18, Nr. 3 (März 2012): 555–61. <https://doi.org/10.1002/ibd.21695>.
- Karolewska-Bochenek, K., I. Lazowska-Przeorek, P. Albrecht, K. Grzybowska, J. Ryzko, K. Szamotulska, A. Radzikowski, u. a. „Epidemiology of inflammatory bowel disease among children in Poland“. *Digestion* 79, Nr. 2 (2009): 121–29. <https://doi.org/10.1159/000209382>.
- Kern, Ivana, Olaf Schoffer, Wieland Kiess, Jobst Henker, Martin W. Laaß, Ulf Winkler, Jürgen Quietzsch, u. a. „Incidence Trends of Pediatric Onset Inflammatory Bowel Disease in the

Years 2000-2009 in Saxony, Germany-First Results of the Saxon Pediatric IBD Registry“. *PloS One* 16, Nr. 1 (2021): e0243774. <https://doi.org/10.1371/journal.pone.0243774>.

- Kugathasan, S., R. H. Judd, R. G. Hoffmann, J. Heikenen, G. Telega, F. Khan, S. Weisdorf-Schindele, u. a. „Epidemiologic and Clinical Characteristics of Children with Newly Diagnosed Inflammatory Bowel Disease in Wisconsin: A Statewide Population-Based Study“. *J Pediatr* 143, Nr. 4 (Oktober 2003): 525–31. [https://doi.org/10.1067/s0022-3476\(03\)00444-x](https://doi.org/10.1067/s0022-3476(03)00444-x).
- Kuo, C. J., K. H. Yu, L. C. See, C. T. Chiu, M. Y. Su, C. M. Hsu, C. F. Kuo, M. J. Chiou, J. R. Liu, und H. W. Wang. „The Trend of Inflammatory Bowel Diseases in Taiwan: A Population-Based Study“. *Dig Dis Sci* 60, Nr. 8 (August 2015): 2454–62. <https://doi.org/10.1007/s10620-015-3630-z>.
- Kwak, M. S., J. M. Cha, H. H. Lee, Y. S. Choi, S. I. Seo, K. J. Ko, D. I. Park, S. H. Kim, und T. J. Kim. „Emerging trends of inflammatory bowel disease in South Korea: A nationwide population-based study“. *Journal of Gastroenterology and Hepatology (Australia)* 34, Nr. 6 (2019): 1018–26. <https://doi.org/10.1111/jgh.14542>.
- Ladas, S. D., E. Mallas, K. Giorgiotis, G. Karamanolis, D. Trigonis, A. Markadas, V. Sipsa, und S. A. Raptis. „Incidence of Ulcerative Colitis in Central Greece: A Prospective Study“. *World J Gastroenterol* 11, Nr. 12 (28. März 2005): 1785–87. <https://doi.org/10.3748/wjg.v11.i12.1785>.
- Larsen, M. D., M. E. Baldal, R. G. Nielsen, J. Nielsen, K. Lund, und B. M. Norgard. „The Incidence of Crohn’s Disease and Ulcerative Colitis since 1995 in Danish Children and Adolescents <17 Years - Based on Nationwide Registry Data“. *Scand J Gastroenterol* 51, Nr. 9 (September 2016): 1100–1105. <https://doi.org/10.3109/00365521.2016.1172340>.
- Lehtinen, Pieta, Merja Ashorn, Sari Iltanen, Raimo Jauhola, Pekka Jauhonen, Kaija-Leena Kolho, und Anssi Auvinen. „Incidence Trends of Pediatric Inflammatory Bowel Disease in Finland, 1987-2003, a Nationwide Study.“ *Inflammatory Bowel Diseases* 17, Nr. 8 (August 2011): 1778–83. <https://doi.org/10.1002/ibd.21550>.
- Lindberg, E., und G. Jornerot. „The Incidence of Crohn’s Disease Is Not Decreasing in Sweden“. *Scand J Gastroenterol* 26, Nr. 5 (Mai 1991): 495–500. <https://doi.org/10.3109/00365529108998572>.
- Lindberg, E., B. Lindquist, L. Holmquist, und H. Hildebrand. „Inflammatory Bowel Disease in Children and Adolescents in Sweden, 1984-1995“. *J Pediatr Gastroenterol Nutr* 30, Nr. 3 (März 2000): 259–64. <https://doi.org/10.1097/00005176-2000033000-00009>.
- Lindquist, B. L., G. Jarnerot, und G. Wickbom. „Clinical and Epidemiological Aspects of Crohn’s Disease in Children and Adolescents“. *Scand J Gastroenterol* 19, Nr. 4 (Juni 1984): 502–6.
- Lopez, R. N., L. Appleton, R. B. Gearry, und A. S. Day. „Rising Incidence of Paediatric Inflammatory Bowel Disease in Canterbury, New Zealand, 1996-2015“. *Journal of Pediatric Gastroenterology and Nutrition* 66, Nr. 2 (2018): e45–50. <https://doi.org/10.1097/MPG.0000000000001688>.

- Lopez, R. N., H. M. Evans, L. Appleton, J. Bishop, S. Chin, S. Mouat, R. B. Gearry, and A. S. Day. „Prospective Incidence of Paediatric Inflammatory Bowel Disease in New Zealand in 2015: Results from the Paediatric Inflammatory Bowel Disease in New Zealand (PINZ) Study“. *Journal of Pediatric Gastroenterology and Nutrition* 66, Nr. 5 (2018): e122–26. <https://doi.org/10.1097/MPG.0000000000001806>.
- Lovasz, B. D., L. Lakatos, A. Horvath, T. Pandur, Z. Erdelyi, M. Balogh, I. Szipocs, u. a. „Incidence Rates and Disease Course of Paediatric Inflammatory Bowel Diseases in Western Hungary between 1977 and 2011“. *Dig Liver Dis* 46, Nr. 5 (Mai 2014): 405–11. <https://doi.org/10.1016/j.dld.2013.12.013>.
- Malaty, H. M., X. Fan, A. R. Opekun, C. Thibodeaux, und G. D. Ferry. „Rising Incidence of Inflammatory Bowel Disease among Children: A 12-Year Study“. *J Pediatr Gastroenterol Nutr* 50, Nr. 1 (Januar 2010): 27–31. <https://doi.org/10.1097/MPG.0b013e3181b99baa>.
- Malmborg, P., L. Grahnquist, J. Lindholm, S. Montgomery, und H. Hildebrand. „Increasing Incidence of Paediatric Inflammatory Bowel Disease in Northern Stockholm County, 2002-2007“. *J Pediatr Gastroenterol Nutr* 57, Nr. 1 (Juli 2013): 29–34. <https://doi.org/10.1097/MPG.0b013e31828f21b4>.
- Martin-de-Carpi, J., E. Ramos, S. Jimenez, M. J. Martinez-Gomez, E. Medina, J. Serrano, E. Ricart, u. a. „Increasing incidence of pediatric inflammatory bowel disease in Spain (1996-2009): The SPIRIT registry“. *Inflammatory Bowel Diseases* 19, Nr. 1 (2013): 73–80. <https://doi.org/10.1002/ibd.22980>.
- Muller, K. E., P. L. Lakatos, A. Arato, J. B. Kovacs, A. Varkonyi, D. Szucs, E. Szakos, u. a. „Incidence, Paris Classification, and Follow-up in a Nationwide Incident Cohort of Pediatric Patients with Inflammatory Bowel Disease“. *J Pediatr Gastroenterol Nutr* 57, Nr. 5 (November 2013): 576–82. <https://doi.org/10.1097/MPG.0b013e31829f7d8c>.
- Nyhlin, H., und A. Danielsson. „Incidence of Crohn’s Disease in a Defined Population in Northern Sweden, 1974-1981“. *Scand J Gastroenterol* 21, Nr. 10 (Dezember 1986): 1185–92. <https://doi.org/10.3109/00365528608996441>.
- Olafsdottir, E. J., G. Fluge, und K. Haug. „Chronic Inflammatory Bowel Disease in Children in Western Norway“. *J Pediatr Gastroenterol Nutr* 8, Nr. 4 (Mai 1989): 454–58. <https://doi.org/10.1097/00005176-198905000-00006>.
- Ong, C., M. M. Aw, M. J. Liwanag, S. H. Quak, und K. B. Phua. „Rapid Rise in the Incidence and Clinical Characteristics of Pediatric Inflammatory Bowel Disease in a South-East Asian Cohort in Singapore, 1994-2015“. *J Dig Dis* 19, Nr. 7 (Juli 2018): 395–403. <https://doi.org/10.1111/1751-2980.12641>.
- Orel, R., T. Kamhi, G. Vidmar, und P. Mamula. „Epidemiology of Pediatric Chronic Inflammatory Bowel Disease in Central and Western Slovenia, 1994-2005“. *J Pediatr Gastroenterol Nutr* 48, Nr. 5 (Mai 2009): 579–86. <https://doi.org/10.1097/MPG.0b013e318164d903>.
- Phavichitr, N., D. J. Cameron, und A. G. Catto-Smith. „Increasing Incidence of Crohn’s Disease in Victorian Children“. *J Gastroenterol Hepatol* 18, Nr. 3 (März 2003): 329–32. <https://onlinelibrary.wiley.com/doi/pdf/10.1046/j.1440-1746.2003.02975.x>.

- Schwarz, J., J. Sykora, D. Cvalinova, R. Pomahacova, J. Kleckova, M. Kryl, und P. Vcelak. „Inflammatory Bowel Disease Incidence in Czech Children: A Regional Prospective Study, 2000-2015“. *World J Gastroenterol* 23, Nr. 22 (14. Juni 2017): 4090–4101. <https://doi.org/10.3748/wjg.v23.i22.4090>.
- Shivashankar, Raina, William J. Tremaine, W. Scott Harmsen, und Edward V. Jr Loftus. „Incidence and Prevalence of Crohn’s Disease and Ulcerative Colitis in Olmsted County, Minnesota From 1970 Through 2010.“ *Clinical Gastroenterology and Hepatology : The Official Clinical Practice Journal of the American Gastroenterological Association* 15, Nr. 6 (Juni 2017): 857–63. <https://doi.org/10.1016/j.cgh.2016.10.039>.
- Sjoberg, D., T. Holmstrom, M. Larsson, A. L. Nielsen, L. Holmquist, A. Ekblom, und A. Ronnblom. „Incidence and Clinical Course of Crohn’s Disease during the First Year - Results from the IBD Cohort of the Uppsala Region (ICURE) of Sweden 2005-2009“. *J Crohns Colitis* 8, Nr. 3 (März 2014): 215–22. <https://doi.org/10.1016/j.crohns.2013.08.009>.
- Stordal, K., J. Jahnsen, B. S. Bentsen, und B. Moum. „Pediatric Inflammatory Bowel Disease in Southeastern Norway: A Five-Year Follow-up Study“. *Digestion* 70, Nr. 4 (2004): 226–30. <https://doi.org/10.1159/000082893>.
- Stowe, S. P., S. R. Redmond, J. M. Stormont, A. N. Shah, L. N. Chessin, H. L. Segal, und W. Y. Chey. „An Epidemiologic Study of Inflammatory Bowel Disease in Rochester, New York. Hospital Incidence“. *Gastroenterology* 98, Nr. 1 (Januar 1990): 104–10. [https://doi.org/10.1016/0016-5085\(90\)91297-j](https://doi.org/10.1016/0016-5085(90)91297-j).
- Tourtelier, Y., A. Dabadie, I. Tron, J. L. Alexandre, M. Robaskiewicz, E. Cruchant, J. A. Seyrig, D. Heresbach, und J. F. Bretagne. „[Incidence of inflammatory bowel disease in children in Brittany (1994-1997). Breton association of study and research on digestive system diseases (Abermad)]“. *Arch Pediatr* 7, Nr. 4 (April 2000): 377–84. [https://doi.org/10.1016/s0929-693x\(00\)88832-6](https://doi.org/10.1016/s0929-693x(00)88832-6).
- Turunen, P., K. L. Kolho, A. Auvinen, S. Iltanen, H. Huhtala, und M. Ashorn. „Incidence of Inflammatory Bowel Disease in Finnish Children, 1987-2003“. *Inflamm Bowel Dis* 12, Nr. 8 (August 2006): 677–83. <https://doi.org/10.1097/00054725-200608000-00002>.
- Urlep, D., R. Blagus, und R. Orel. „Incidence Trends and Geographical Variability of Pediatric Inflammatory Bowel Disease in Slovenia: A Nationwide Study“. *Biomed Res Int* 2015 (2015): 921730. <https://doi.org/10.1155/2015/921730>.
- Urlep, D., T. K. Trop, R. Blagus, und R. Orel. „Incidence and Phenotypic Characteristics of Pediatric IBD in Northeastern Slovenia, 2002-2010“. *J Pediatr Gastroenterol Nutr* 58, Nr. 3 (März 2014): 325–32. <https://doi.org/10.1097/mpg.0000000000000207>.
- Urne, F. U., und A. Paerregaard. „[Chronic inflammatory bowel disease in children. An epidemiological study from eastern Denmark 1998-2000]“. *Ugeskr Laeger* 164, Nr. 49 (2. Dezember 2002): 5810–14.
- Vicentin, R., M. Wagener, A. B. Pais, M. Contreras, und M. Orsi. „One-Year Prospective Registry of Inflammatory Bowel Disease in the Argentine Pediatric Population“. *Arch Argent Pediatr* 115, Nr. 6 (1. Dezember 2017): 533–40. <https://doi.org/10.5546/aap.2017.eng.533>.

- Virta, L. J., M. M. Saarinen, und K. L. Kolho. „Inflammatory Bowel Disease Incidence Is on the Continuous Rise Among All Paediatric Patients Except for the Very Young: A Nationwide Registry-Based Study on 28-Year Follow-Up“. *J Crohns Colitis* 11, Nr. 2 (Februar 2017): 150–56. <https://doi.org/10.1093/ecco-jcc/jjw148>.
- Wang, X. Q., Y. Zhang, C. D. Xu, L. R. Jiang, Y. Huang, H. M. Du, und X. J. Wang. „Inflammatory Bowel Disease in Chinese Children: A Multicenter Analysis over a Decade from Shanghai“. *Inflamm Bowel Dis* 19, Nr. 2 (Februar 2013): 423–28. <https://doi.org/10.1097/MIB.0b013e318286f9f2>.
- Watson, A. J., A. T. Johnston, P. M. Barker, G. G. Youngson, W. M. Bisset, und A. A. Mahomed. „The Presentation and Management of Juvenile-Onset Chronic Inflammatory Bowel Disease in Northeastern Scotland“. *J Pediatr Surg* 37, Nr. 1 (Januar 2002): 83–86. <https://doi.org/10.1053/jpsu.2002.29434>.
- Yamamoto-Furusho, J. K., A. Sarmiento-Aguilar, J. J. Toledo-Maurino, K. E. Bozada-Gutierrez, F. J. Bosques-Padilla, M. A. Martinez-Vazquez, V. Marroquin-Jimenez, u. a. „Incidence and Prevalence of Inflammatory Bowel Disease in Mexico from a Nationwide Cohort Study in a Period of 15 Years (2000-2017)“. *Medicine (Baltimore)* 98, Nr. 27 (Juli 2019): e16291. <https://doi.org/10.1097/md.00000000000016291>.
- Yap, J., A. Wesley, S. Mouat, und S. Chin. „Paediatric Inflammatory Bowel Disease in New Zealand“. *N Z Med J* 121, Nr. 1283 (3. Oktober 2008): 19–34.
- Zaag-Loonen, H. J. van der, M. Casparie, J. A. Taminiau, J. C. Escher, R. R. Pereira, und H. H. Derkx. „The Incidence of Pediatric Inflammatory Bowel Disease in the Netherlands: 1999-2001“. *J Pediatr Gastroenterol Nutr* 38, Nr. 3 (März 2004): 302–7. <https://doi.org/10.1097/00005176-200403000-00014>.
- Zayyani, N. R., H. M. Malaty, und D. Y. Graham. „Increasing Incidence of Crohn’s Disease with Familial Clustering in the Kingdom of Bahrain: A 25-Year Population-Based Study“. *Inflamm Bowel Dis* 23, Nr. 2 (Februar 2017): 304–9. <https://doi.org/10.1097/mib.0000000000001016>.
